# Supplementary material for: The effect of varying solvents for MoS2 treatment on its catalytic efficiencies for HER and ORR
Source: Royal Society of Chemistry journal article supplement (doi:10.1039/c6cp08205j), 2017-01-01
Supplement: c6cp08205j1.pdf [file c6cp08205j1.pdf]

## Supporting Information

# The Effects of Varying Solvent for MoS<sub>2</sub> Treatment on its Catalytic Efficiencies for HER and ORR

*Xing Juan Chua<sup>†</sup> and Martin Pumera<sup>\*†</sup>*

<sup>†</sup>Division of Chemistry & Biological Chemistry, School of Physical and Mathematical  
Sciences, Nanyang Technological University, Singapore 637371, Singapore and

\*Email: [pumera@ntu.edu.sg](mailto:pumera@ntu.edu.sg)

## **Supporting Information**

### **Contents**

1. Scanning electron micrograph showing the surface morphologies of the deposited MoS<sub>2</sub> dispersed in various solvents.
2. Values of the observed heterogeneous electron transfer (HET) rates,  $k_{obs}^0$ , of MoS<sub>2</sub> dispersed in various solvent.
3. Control Experiment using solvent-only modified GCE for HER
4. Tafel Plots of the Freshly-Prepared MoS<sub>2</sub>-Dispersion.

1. Scanning electron micrograph showing the surface morphologies of the deposited MoS<sub>2</sub> dispersed in various solvents.

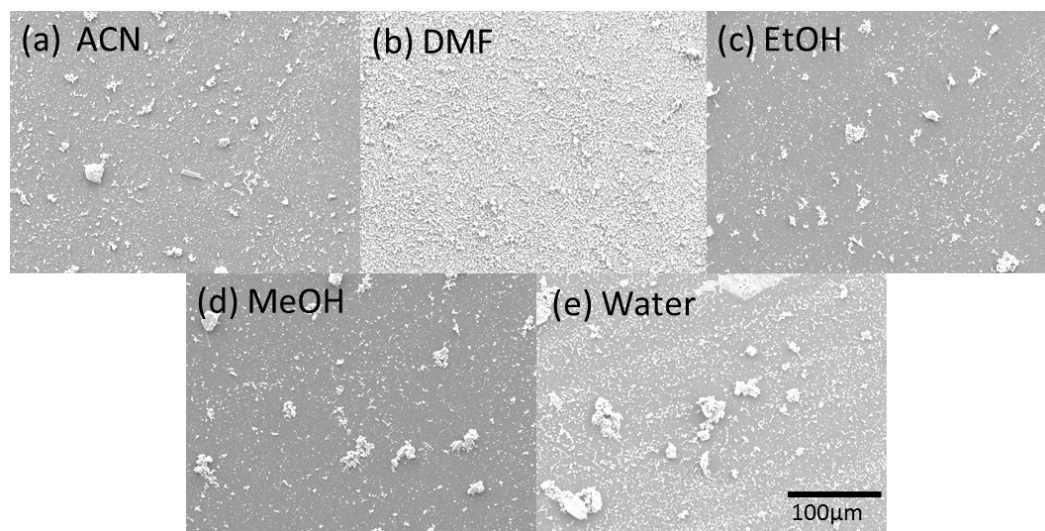

**Figure S1:** SEM images of MoS<sub>2</sub> drop-casted on the silicon oxide wafer. The aliquots were taken from MoS<sub>2</sub> dispersed in various solvents: (a) ACN (5mg/mL; 1μL), (b) DMF (5mg/mL; 1μL), (c) EtOH (5mg/mL; 1μL), (d) MeOH (5mg/mL; 1μL) and (e) water (1mg/mL; 5μL). Scale bars represent 100 μm. Legend: (*X* mg/mL, *Y* μL), *X* refers to the concentration of the dispersion and *Y* refers to the volume used for drop-casting, with the final MoS<sub>2</sub> loading being constant.

2. Values of the observed heterogeneous electron transfer (HET) rates,  $k_{obs}^0$ , of MoS<sub>2</sub> dispersed in various solvent.

**Table S1:** Calculated observed heterogeneous electron transfer rate constant  $k_{obs}^0$  for the Fe(CN)<sub>6</sub><sup>3-/4-</sup> redox probe when MoS<sub>2</sub> is dispersed in various solvents. Bare glassy carbon electrode (GCE) is also shown for reference.

| Solvent  | $k_{obs}^0$ (cm s <sup>-1</sup> ) |
|----------|-----------------------------------|
| ACN      | $2.99 \times 10^{-3}$             |
| DMF      | $5.90 \times 10^{-4}$             |
| EtOH     | $3.53 \times 10^{-3}$             |
| MeOH     | $2.74 \times 10^{-3}$             |
| Water    | $1.88 \times 10^{-3}$             |
| Bare GCE | $3.20 \times 10^{-3}$             |

### 3. Control Experiment using solvent-only modified GCE for HER

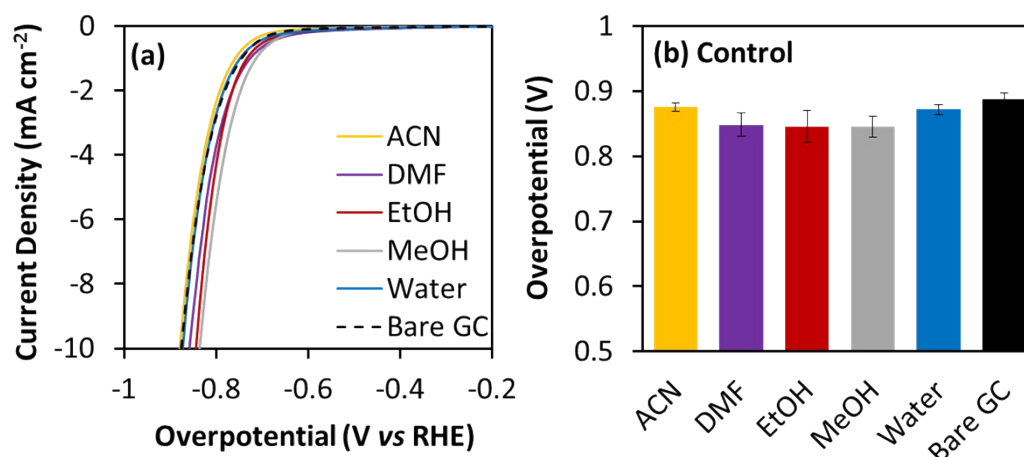

**Figure S2:** The control experiment for the HER where only solvents (without any material suspended) were drop-casted on bare GCE. (a) Polarization curve for HER and (b) the bar chart shows the overpotential required to reach the specific current density of  $-10 \text{ mA cm}^{-2}$ . Conditions:  $0.5 \text{ M H}_2\text{SO}_4$ ; scan rate:  $2 \text{ mV s}^{-1}$ . Error bars correspond to standard deviations based on triplicate measurements. Potentials are with respect to RHE.

### 4. Tafel Plots of the Freshly-Prepared $\text{MoS}_2$ -Dispersion.

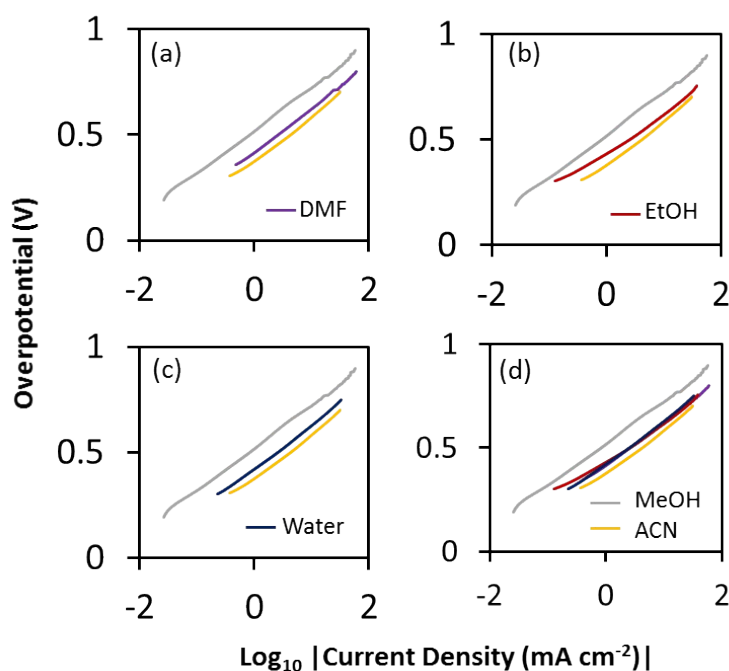

**Figure S3.** The Tafel plots of the freshly prepared dispersions of  $\text{MoS}_2$  in the five solvents. DMF, EtOH and water were separated to ensure clarity.
